# Supplementary material for: Modeling boreal forest’s mineral soil and peat C stock dynamics with Yasso07 model coupled with updated moisture modifier
Source: Copernicus journal article supplement (doi:10.5194/egusphere-2023-1523), 2023-08-18
Supplement: Supplementary file 1 [file egusphere-2023-1523-supplement.pdf]

## Supplementary information:

# Modeling boreal forest's mineral soil and peat C stock dynamics with Yasso07 model coupled with updated moisture modifier

5 Boris Ľupek<sup>1</sup>, Aleksi Lehtonen<sup>1</sup>, Alla Yurova<sup>2</sup>, Rose Abramoff<sup>3,5,9</sup>, Stefano Manzoni<sup>4</sup>, Bertrand Guenet<sup>5</sup>, Elisa Bruni<sup>5</sup>, Samuli Launiainen<sup>1</sup>, Mikko Peltoniemi<sup>1</sup>, Shoji Hashimoto<sup>6</sup>, Xianglin Tian<sup>7,8</sup>, Juha Heikkinen<sup>1</sup>, Kari Minkkinen<sup>7</sup>, and Raisa Mäkipää<sup>1</sup>

<sup>1</sup>Natural Resources Institute Finland (LUKE), Helsinki, 00790, Finland

<sup>2</sup>Northwest Institute of Eco-environment and Resources, Lanzhou, 730000, China

<sup>3</sup>Lawrence Berkley National Laboratory, University of California, Berkeley, 94720, USA

<sup>4</sup>Stockholm University, Stockholm, 10691, Sweden

10 <sup>5</sup>Laboratoire de Géologie, L'École Normale Supérieure (ENS), Paris, 75005, France

<sup>6</sup>Forestry and Forest Products Research Institute (FFPRI), Tsukuba, 305-8687, Japan

<sup>7</sup>Helsinki University, Helsinki, 00014, Finland

<sup>8</sup>College of Forestry, Northwest A & F University, Shaanxi, 712100, China

<sup>9</sup>Ronin Institute, Montclair, New Jersey, 07043-2314, USA

15 Corresponding author: Boris Ľupek (boris.tupek@luke.fi)

Content:

1. Table S1

2. Figures S1 ... S3

25 Table S1. The prior distribution of parameters of Yasso07. $\xi_D$  version of Yasso07 soil carbon model (parameters  $k_A \dots \delta_2$ ) coupled with environmental function  $\xi_D$  (Eq. (4), parameters  $d, q, SWC_{opt}$ ), and parameters of likelihood function (Eq. (6),  $a_{SOC}, b_{SOC}, a_{CO_2}, b_{CO_2}$ ) used with observations SOC stocks and  $CO_2$  emissions from forest/mire ecotone sites for Bayesian optimization.

| parameters    | Prior $p(\theta)$ |        |        |
|---------------|-------------------|--------|--------|
|               | 2.50%             | 50%    | 97.50% |
| $k_A$         | 0.62              | 0.73   | 0.84   |
| $k_W$         | 5                 | 5.8    | 6.6    |
| $k_E$         | 0.24              | 0.29   | 0.35   |
| $k_N$         | 0.027             | 0.031  | 0.042  |
| $k_H$         | 0.0014            | 0.0017 | 0.0019 |
| $\alpha_{AW}$ | 0.41              | 0.48   | 0.54   |
| $\alpha_{AE}$ | 0                 | 0.01   | 0.16   |
| $\alpha_{AN}$ | 0.6               | 0.83   | 0.98   |
| $\alpha_{WA}$ | 0.94              | 0.99   | 1      |
| $\alpha_{WE}$ | 0                 | 0      | 0.08   |
| $\alpha_{WN}$ | 0                 | 0.01   | 0.21   |
| $\alpha_{EA}$ | 0                 | 0      | 0.004  |
| $\alpha_{EW}$ | 0                 | 0      | 0.003  |
| $\alpha_{EN}$ | 0                 | 0.03   | 0.25   |
| $\alpha_{NA}$ | 0                 | 0      | 0.007  |
| $\alpha_{NW}$ | 0                 | 0.01   | 0.031  |
| $\alpha_{NE}$ | 0.79              | 0.92   | 0.99   |
| $\alpha_H$    | 0.0037            | 0.0045 | 0.0056 |
| $\delta_1$    | -1.9              | -1.7   | -1.5   |
| $\delta_2$    | 0.76              | 0.86   | 0.96   |
| $r$           | -0.321            | -0.306 | -0.29  |
| $d$           | 0.9989            | 0.999  | 0.9999 |
| $Q_{10}$      | 0.7               | 1.743  | 5      |
| $SWC_{opt}$   | 5                 | 31.69  | 50     |
| $a_{SOC}$     | 0.0001            | 80     | 150    |
| $b_{SOC}$     | 0.0001            | 1      | 3      |
| $a_{CO_2}$    | 0.0001            | 0.15   | 0.7    |
| $b_{CO_2}$    | 0.0001            | 0.5    | 3      |

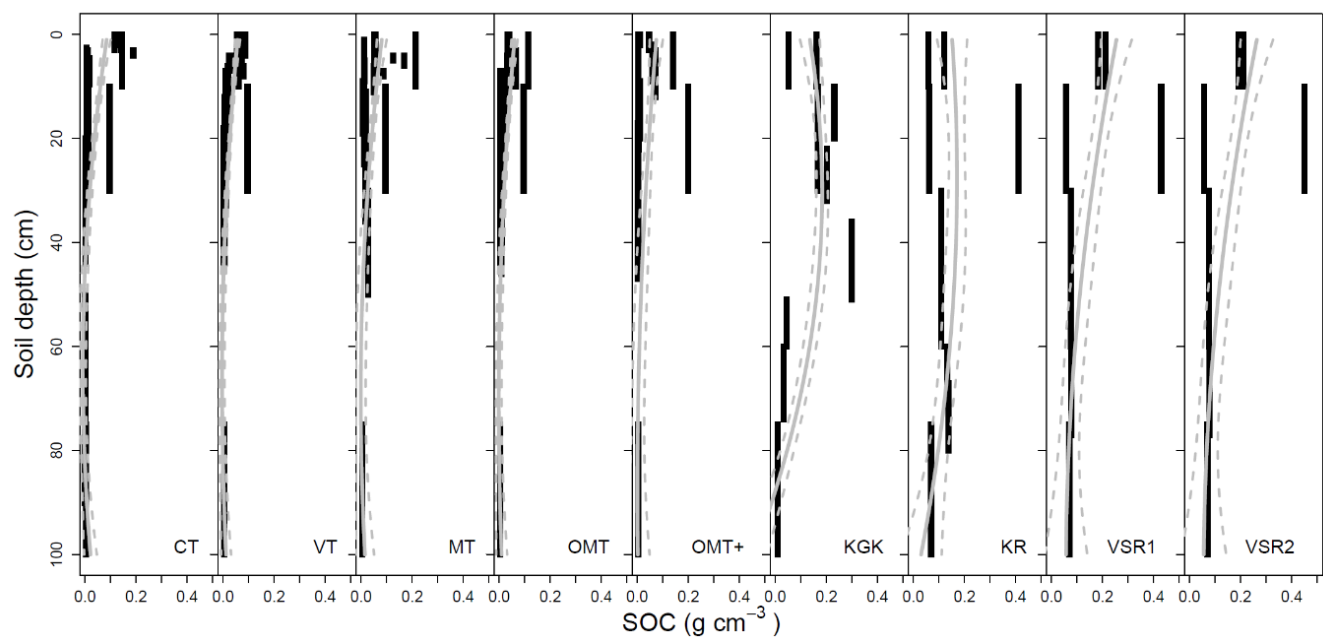

Figure S1. Soil organic carbon content (SOC, g cm<sup>-3</sup>) for samples soil layers of different depth and the fitted functions used for interpolation of total SOC up to 1m.

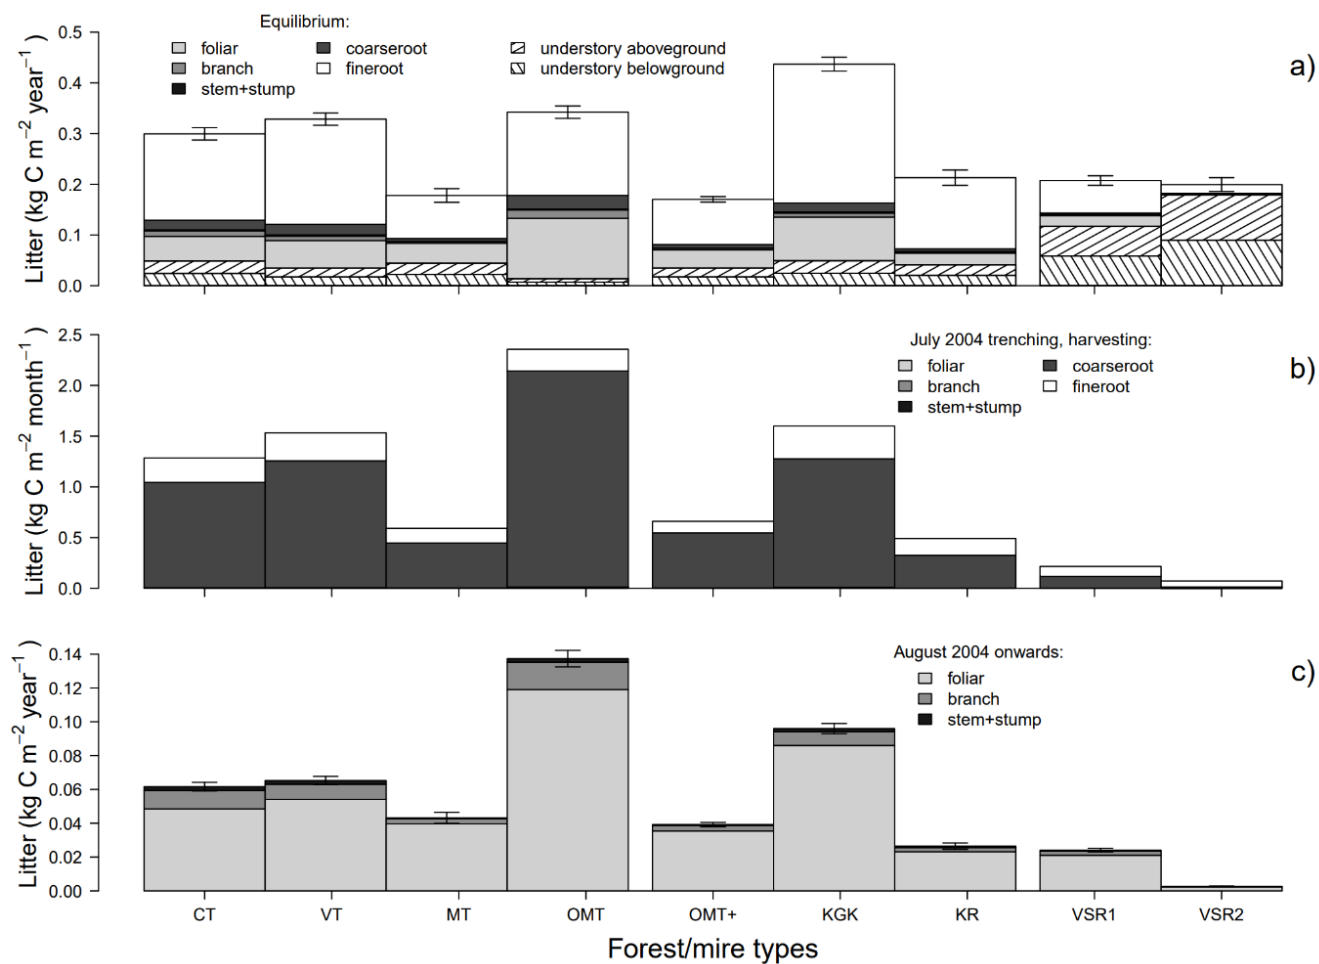

Figure S2. Litter input for nine forest/mire types derived separately from each biomass component (foliage, branches, stem and stump, roots, and understory) for assumed equilibrium state forest before trenching (a), during root trenching (b), and after trenching (c).

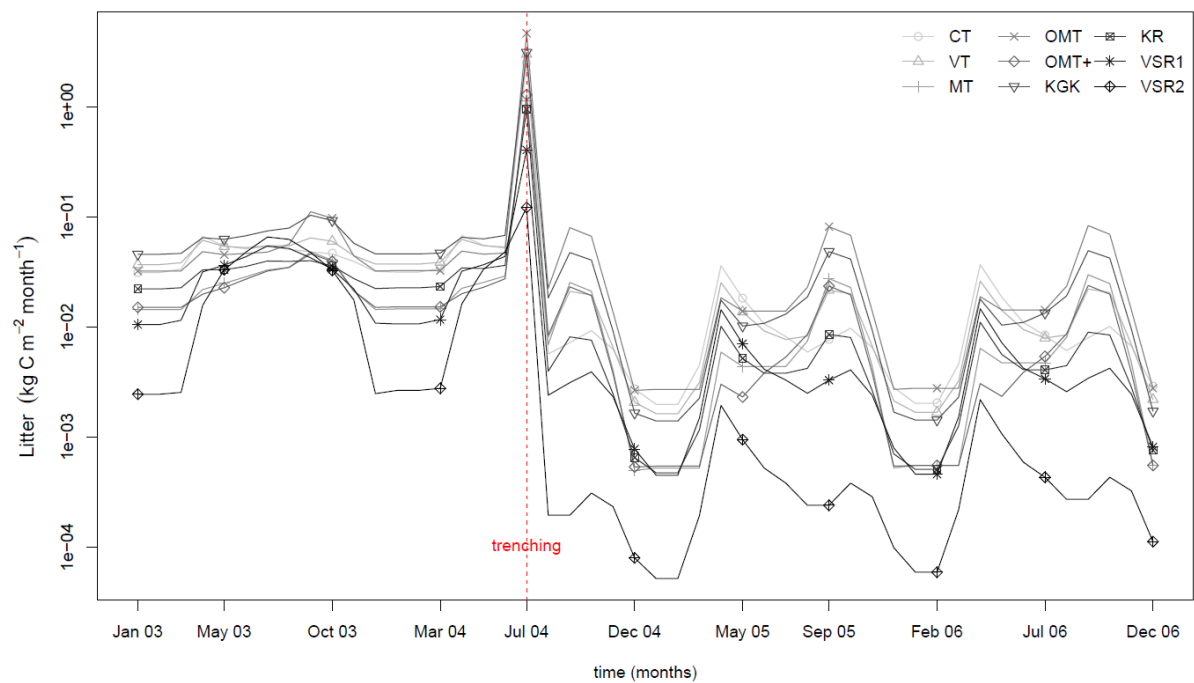

35 Figure S3. Monthly time series of the total litter input of nine forest/mire types.
